# Supplementary material
Source: MDPI journal article supplement (https://www.mdpi.com/2076-3417/9/18/3920)
Supplement: s1 [file s1]

# FDG ROBOTIC SYSTEM CHARACTERISTICS FORM

## General information

**Compiler**

Name:

Profession:

**Date**

**System Name**

**Manufacturer**

**Company Website**

**Compiler Confidence level**

- High – Regular User/System tested on patients
- Medium – Live Demo
- Low – Literature, website, s-network...

## System characteristics

**Type of system**

- End-effector
- Exoskeleton

**Multiple versions or models (i.e.: with different HW...)**

- Yes
- No

**Segment**

- Upper Limb
- Hand
- Lower Limb

**Pathologies indicated to treatment**

- Spinal Cord Injury
- Traumatic brain injury
- Stroke ( Flaccid  Spastic)
- Orthopaedic
- Movement disorders due to aging
- Cerebral palsy
- Parkinson
- Multiple Sclerosis

|                                                                                                                    |                                                           |
|--------------------------------------------------------------------------------------------------------------------|-----------------------------------------------------------|
|                                                                                                                    | <input type="checkbox"/> Cardio-respiratory               |
|                                                                                                                    | <input type="checkbox"/> _____                            |
| <b>Maximum Level of impairment</b>                                                                                 | <input type="checkbox"/> Low                              |
|                                                                                                                    | <input type="checkbox"/> Medium                           |
|                                                                                                                    | <input type="checkbox"/> High                             |
| <b>Contraindications</b>                                                                                           | <input type="checkbox"/> Yes (severe spasticity)          |
|                                                                                                                    | <input type="checkbox"/> No                               |
| <b>Stage of development</b>                                                                                        | <input type="checkbox"/> Commercial                       |
|                                                                                                                    | <input type="checkbox"/> Prototype                        |
| <b>Portability</b>                                                                                                 | <input type="checkbox"/> Stationary system                |
|                                                                                                                    | <input type="checkbox"/> Portable system (weight: ___ kg) |
|                                                                                                                    | <input type="checkbox"/> Linear                           |
| <b>Movement</b>                                                                                                    | <input type="checkbox"/> Planar                           |
|                                                                                                                    | <input type="checkbox"/> Three-dimensional                |
| <b>Assisted Joint Movement</b><br>(example: shoulder ab-adduction, elbow flex-extension, knee flex-extension etc.) |                                                           |
| <b>Type of Assistance<sup>1</sup></b><br>(multiple choices are possible)                                           | <input type="checkbox"/> Active-assisted                  |
|                                                                                                                    | <input type="checkbox"/> Resistive                        |
|                                                                                                                    | <input type="checkbox"/> Passive                          |
| <b>Is it possible to customize user interface/exercises?</b>                                                       | <input type="checkbox"/> Yes                              |
|                                                                                                                    | <input type="checkbox"/> No                               |
| <b>Main Control Inputs</b>                                                                                         | <input type="checkbox"/> Joint Angle                      |
|                                                                                                                    | <input type="checkbox"/> End-Point Position               |
|                                                                                                                    | <input type="checkbox"/> Force/Torque                     |
|                                                                                                                    | <input type="checkbox"/> sEMG                             |
|                                                                                                                    | <input type="checkbox"/> Other (please specify) _____     |
| <b>Are Outcome Measures provided?</b>                                                                              | <input type="checkbox"/> Yes (specify which) _____        |
|                                                                                                                    | <input type="checkbox"/> No                               |
| <b>Normative values for the outcome variables</b>                                                                  | <input type="checkbox"/> Yes                              |
|                                                                                                                    | <input type="checkbox"/> No                               |
| <b>Accessibility for the patient with his/her own wheelchair during therapy?</b>                                   | <input type="checkbox"/> Yes                              |
|                                                                                                                    | <input type="checkbox"/> No                               |

<sup>1</sup> ACTIVE-ASSISTED: the patient's limb is moved by the device according to his/her ability; PASSIVE: the patient's limb is moved passively by the device ; RESISTIVE: the device providing resistance to the patient's limb movements.

---

**Safety issues**

- Yes (please specify \_\_\_\_\_)
- No

**Scenario**

- Ecological
- Imposed/static

**Special needs for installation**

- Yes (please specify \_\_\_\_\_)
- No

**Autonomy**

- The patient can use/control the device in autonomy
- The patient can use/control the device under PT supervision (which can be duty also in other activities contemporary)
- The PT must control continuously the patient's robot training

**Group Therapy**

- Yes
- No

**Number of clinicians involved in the treatment**

- PT N: \_\_\_\_\_
- MD N: \_\_\_\_\_
- Logo N: \_\_\_\_\_
- Neuropsychyco N: \_\_\_\_\_

**Preparation time (or time to wear the robot)**

Minutes:

**Therapy administration**

n°/week:  
Duration:

**Literature**

- Scientific paper on peer reviewed journals
- Internal company documentation
- Not-published data

**Free test period**

- Yes (specify max n° months/weeks):
- No

**Maintenance Costs [if available]**

- Yes (specify €/year \_\_\_\_\_ and item/year \_\_\_\_)
- No
- Not Available

**Cost (detailing cost for multiple versions)**

---

**Demonstration**  Yes (When: \_\_\_\_\_ Where: \_\_\_\_\_)  
 No  
 To be scheduled (When \_\_\_\_\_ Where \_\_\_\_\_)

**Company contact person**  Name:  
 Phone  
 Email

**Is the enterprise open to future collaboration?**  Yes  
 No

**Technical documentation attached**  Yes  
 No

---

---

### Compiler evaluation

**Purchase priority**  Low – Not purchase  
 Medium – Suggested purchase  
 High – Purchase with Priority

**Purchase priority choice explanation**

**Notes** \_\_\_\_\_  
\_\_\_\_\_  
\_\_\_\_\_  
\_\_\_\_\_

---
